# Supplementary material for: Vertical distribution characteristics of soil organic carbon and vegetation types under different elevation gradients in Cangshan, Dali
Source: PeerJ. 2024 Jan 4;12:e16686. doi: 10.7717/peerj.16686 (PMC10771771; doi:10.7717/peerj.16686)
Supplement: Supplemental Information 1 — The data contains parallel values and average values. [file peerj-12-16686-s001.xlsx]

## Sheet: pH
pH
Elevation (m)	Soil depth (cm)	1	2	3	Mean value
2400	0-5	4.6	4.34	4.19	4.37667
	5-10	4.77	4.78	4.8	4.78333
	10-20	5.01	5.14	5.01	5.05333
	20-30	5.16	5.18	5.08	5.14
2600	0-5	5.14	4.36	4.62	4.70667
	5-10	5.13	4.91	5.03	5.02333
	10-20	5.23	5.14	5.25	5.20667
	20-30	5.28	5.07	5.56	5.30333
2800	0-5	5.27	5.44	6.21	5.64
	5-10	5.57	5.67	5.41	5.55
	10-20	6.05	5.59	5.26	5.63333
	20-30	5.61	5.55	5.4	5.52
3000	0-5	6.72	6.26	6.82	6.6
	5-10	6.68	6.75	6.92	6.78333
	10-20	6.61	6.55	6.78	6.64667
	20-30	6.72	6.68	6.75	6.71667
3200	0-5	6.05	5.65	6.07	5.92333
	5-10	5.5	5.35	5.8	5.55
	10-20	5.31	5.91	5.51	5.57667
	20-30	5.11	5.55	5.55	5.40333
3400	0-5	4.8	4.81	5.02	4.87667
	5-10	4.71	4.92	4.8	4.81
	10-20	4.76	5.01	5.07	4.94667
	20-30	5.12	5.09	5.16	5.12333
3600	0-5	4.73	4.13	4.26	4.37333
	5-10	4.58	4.31	4.28	4.39
	10-20	4.54	4.54	4.24	4.44
	20-30	4.62	4.54	4.46	4.54
