# Supplementary material for: Vertical distribution characteristics of soil organic carbon and vegetation types under different elevation gradients in Cangshan, Dali
Source: PeerJ. 2024 Jan 4;12:e16686. doi: 10.7717/peerj.16686 (PMC10771771; doi:10.7717/peerj.16686)
Supplement: Supplemental Information 2 [file peerj-12-16686-s002.xlsx]

## Sheet: Soil organic matter
Soil organic matter
Elevation (m)	Soil depth (cm)	Soil organic matter	Mean value
2400-1	0-5	0.173096	0.192971
	5-10	0.145624	0.153568
	10-20	0.126288	0.125502
	20-30	0.106311	0.11714
2400-2	0-5	0.166608
	5-10	0.164397
	10-20	0.111832
	20-30	0.11064
2400-3	0-5	0.239208
	5-10	0.150684
	10-20	0.138387
	20-30	0.134469
2600-1	0-5	0.203757	0.275108
	5-10	0.166924	0.194316
	10-20	0.147229	0.16797
	20-30	0.145077	0.161082
2600-2	0-5	0.300504
	5-10	0.201716
	10-20	0.163321
	20-30	0.164397
2600-3	0-5	0.321062
	5-10	0.214307
	10-20	0.193358
	20-30	0.173772
2800-1	0-5	0.280178	0.372398
	5-10	0.223701	0.230302
	10-20	0.201186	0.185895
	20-30	0.202838	0.182564
2800-2	0-5	0.397483
	5-10	0.235937
	10-20	0.161136
	20-30	0.162705
2800-3	0-5	0.439535
	5-10	0.231268
	10-20	0.195364
	20-30	0.182149
3000-1	0-5	0.173418	0.163626
	5-10	0.156369	0.139233
	10-20	0.14795	0.137354
	20-30	0.140744	0.125696
3000-2	0-5	0.161013
	5-10	0.136448
	10-20	0.132471
	20-30	0.108229
3000-3	0-5	0.156446
	5-10	0.124882
	10-20	0.131641
	20-30	0.128115
3200-1	0-5	0.161914	0.1514
	5-10	0.183252	0.166862
	10-20	0.199631	0.17064
	20-30	0.226391	0.167225
3200-2	0-5	0.150185
	5-10	0.164838
	10-20	0.14153
	20-30	0.109482
3200-3	0-5	0.142102
	5-10	0.152497
	10-20	0.170757
	20-30	0.165802
3400-1	0-5	0.1812	0.18079
	5-10	0.143492	0.162076
	10-20	0.148837	0.163728
	20-30	0.139852	0.16191
3400-2	0-5	0.164292
	5-10	0.125362
	10-20	0.125531
	20-30	0.132967
3400-3	0-5	0.196878
	5-10	0.217374
	10-20	0.216816
	20-30	0.212909
3600-1	0-5	0.18764	0.182494
	5-10	0.206543	0.160713
	10-20	0.118076	0.13385
	20-30	0.12782	0.12102
3600-2	0-5	0.138712
	5-10	0.0744119
	10-20	0.0816367
	20-30	0.0762314
3600-3	0-5	0.22113
	5-10	0.201183
	10-20	0.201836
	20-30	0.159009
