# Supplementary material for: Vertical distribution characteristics of soil organic carbon and vegetation types under different elevation gradients in Cangshan, Dali
Source: PeerJ. 2024 Jan 4;12:e16686. doi: 10.7717/peerj.16686 (PMC10771771; doi:10.7717/peerj.16686)
Supplement: Supplemental Information 3 [file peerj-12-16686-s003.xlsx]

## Sheet: Soil water content
Soil water content
Elevation (m)	Soil depth (cm)	1	2	3	Mean value
2400	0-5	0.151048	0.21192	0.308351	0.223773
	5-10	0.156716	0.161938	0.253995	0.190883
	10-20	0.13112	0.158605	0.25446	0.181395
	20-30	0.130376	0.155894	0.261065	0.182445
2600	0-5	0.220836	0.374446	0.389499	0.32826
	5-10	0.227552	0.323859	0.31162	0.287677
	10-20	0.236075	0.309864	0.292971	0.279637
	20-30	0.249809	0.317147	0.277678	0.281545
2800	0-5	0.46395	0.43264	0.420689	0.439093
	5-10	0.330774	0.333473	0.346113	0.336787
	10-20	0.311932	0.349467	0.312452	0.324617
	20-30	0.31053	0.357341	0.306135	0.324669
3000	0-5	0.22833	0.112405	0.381658	0.240798
	5-10	0.232633	0.280996	0.151	0.221543
	10-20	0.305558	0.220315	0.15119	0.225688
	20-30	0.327065	0.264582	0.048346	0.213331
3200	0-5	0.314278	0.277835	0.318759	0.303624
	5-10	0.344925	0.306524	0.206309	0.28592
	10-20	0.350729	0.281487	0.242919	0.291712
	20-30	0.344329	0.238706	0.245548	0.276194
3400	0-5	0.135795	0.184374	0.131411	0.150526
	5-10	0.166929	0.130537	0.191754	0.163073
	10-20	0.215176	0.152087	0.215911	0.194391
	20-30	0.241973	0.170286	0.244645	0.218968
3600	0-5	0.118166	0.419712	0.510052	0.34931
	5-10	0.380053	0.331774	0.462698	0.391508
	10-20	0.393946	0.323815	0.474627	0.397463
	20-30	0.389285	0.340374	0.4447	0.391453
