# Supplementary material for: Vertical distribution characteristics of soil organic carbon and vegetation types under different elevation gradients in Cangshan, Dali
Source: PeerJ. 2024 Jan 4;12:e16686. doi: 10.7717/peerj.16686 (PMC10771771; doi:10.7717/peerj.16686)
Supplement: Supplemental Information 4 [file peerj-12-16686-s004.xlsx]

## Sheet: WSOC
WSOC
Elevation (m)	Soil depth (cm)	1	2	3
2400	0-5	357.9	350.04	337.3
	5-10	320.4	312.18	342.9
	10-20	273.24	271.86	228.87
	20-30	261.06	259.92	225.07
2600	0-5	484.5	478.26	310.6
	5-10	355.68	351.06	283.19
	10-20	366.72	362.82	271.17
	20-30	266.46	262.8	266.45
2800	0-5	554.04	552.12	237.71
	5-10	520.44	516.96	263.76
	10-20	417.84	415.98	236.85
	20-30	383.82	382.62	226.57
3000	0-5	392.52	391.08	230.24
	5-10	377.28	372.72	281.11
	10-20	339.72	337.98	234.74
	20-30	264.54	263.34	225.42
3200	0-5	339.72	336.18	264.89
	5-10	310.86	307.02	270.01
	10-20	225.36	221.94	263.15
	20-30	221.7	218.4	261.04
3400	0-5	333.72	318.72	456
	5-10	326.76	310.8	472.3
	10-20	281.4	268.14	427.4
	20-30	273.42	260.46	422.4
3600	0-5	248.52	246.48	239.74
	5-10	239.1	236.94	242.01
	10-20	222.6	220.74	237.94
	20-30	216.54	213.12	263.21
