# Supplementary material for: Vertical distribution characteristics of soil organic carbon and vegetation types under different elevation gradients in Cangshan, Dali
Source: PeerJ. 2024 Jan 4;12:e16686. doi: 10.7717/peerj.16686 (PMC10771771; doi:10.7717/peerj.16686)
Supplement: Supplemental Information 5 [file peerj-12-16686-s005.xlsx]

## Sheet: HFOC-LFOC-SOC
LFOC-HFOC-SOC
Elevation (m)	Soil depth (cm)	LFOC	HFOC	SOC
2400-1	0-5	4.0755	20.943	25.0185
	5-10	6.8835	25.2428	32.1262
	10-20	6.981	17.199	24.18
	20-30	2.2425	18.3397	20.5822
2400-2	0-5	3.198	19.7437	22.9417
	5-10	5.0115	22.4932	27.5048
	10-20	2.34	15.2685	17.6085
	20-30	1.3845	13.8353	15.2197
2400-3	0-5	4.2315	18.135	22.3665
	5-10	5.031	22.3762	27.4073
	10-20	5.148	14.5373	19.6852
	20-30	4.212	13.1333	17.3453
		LFOC	HFOC	SOC
2600-1	0-5	3.705	19.3927	23.0978
	5-10	4.6605	20.7967	25.4572
	10-20	6.5715	23.6633	30.2347
	20-30	4.017	13.8645	17.8815
2600-2	0-5	4.953	15.2685	20.2215
	5-10	6.8445	17.8717	24.7162
	10-20	2.964	22.519	25.483
	20-30	3.9195	13.9522	17.8717
2600-3	0-5	5.8305	16.614	22.4445
	5-10	4.836	20.6212	25.4572
	10-20	3.003	18.018	21.021
	20-30	2.067	16.614	18.681
		LFOC	HFOC	SOC
2800-3	0-5	3.2565	12.168	15.4245
	5-10	4.992	23.4877	28.4797
	10-20	4.5045	19.305	23.8095
	20-30	6.1425	16.3215	22.464
2800-1	0-5	5.4405	20.7383	26.1788
	5-10	7.3515	23.5463	30.8977
	10-20	2.2425	18.72	20.9625
	20-30	1.287	17.316	18.603
2800-2	0-5	4.134	21.528	25.662
	5-10	4.056	22.0545	26.1105
	10-20	6.903	26.2665	33.1695
	20-30	4.212	13.572	17.784
		LFOC	HFOC	SOC
3000-1	0-5	2.847	19.8023	22.6492
	5-10	3.8025	21.2063	25.0087
	10-20	5.7135	23.868	29.5815
	20-30	3.588	21.2063	24.7943
3000-2	0-5	3.4905	16.5555	20.046
	5-10	6.318	25.4475	31.7655
	10-20	3.588	12.8407	16.4288
	20-30	4.5435	14.274	18.8175
3000-3	0-5	6.2985	16.9065	23.205
	5-10	4.524	22.6103	27.1343
	10-20	4.4265	17.9887	22.4153
	20-30	6.2205	20.6797	26.9002
		LFOC	HFOC	SOC
3200-1	0-5	5.06	13.47	18.53
	5-10	6.601	12.885	19.486
	10-20	3.988	17.36	21.348
	20-30	6.425	18.003	24.428
3200-2	0-5	5.509	14.698	20.207
	5-10	2.311	13.674	15.985
	10-20	5.606	21.572	27.178
	20-30	4.124	18.267	22.391
3200-3	0-5	5.158	18.091	23.249
	5-10	4.748	20.694	25.442
	10-20	6.191	16.629	22.82
	20-30	6.425	16.892	23.317
		LFOC	HFOC	SOC
3400-1	0-5	4.202	20.343	24.545
	5-10	3.442	18.588	22.03
	10-20	6.308	17.916	24.224
	20-30	2.408	12.534	14.942
3400-2	0-5	6.191	14.084	20.275
	5-10	4.592	20.841	25.433
	10-20	6.62	19.524	26.144
	20-30	4.787	12.417	17.204
3400-3	0-5	5.782	18.676	24.458
	5-10	4.222	20.548	24.77
	10-20	3.442	15.02	18.462
	20-30	3.676	13.967	17.643
		LFOC	HFOC	SOC
3600-1	0-5	2.574	13.6598	16.2338
	5-10	3.5295	15.0638	18.5933
	10-20	5.3625	17.784	23.1465
	20-30	1.4235	16.8188	18.2422
3600-2	0-5	2.379	18.2228	20.6017
	5-10	4.2315	20.8553	25.0867
	10-20	5.8305	18.252	24.0825
	20-30	3.4515	15.7658	19.2172
3600-3	0-5	2.964	14.1278	17.0918
	5-10	5.226	18.4567	23.6827
	10-20	3.9195	15.561	19.4805
	20-30	2.496	14.3325	16.8285
